# Supplementary material for: Desynchronized liquid crystalline network actuators with deformation reversal capability
Source: PubMed Central journal article supplement (PMC7840968; doi:10.1038/s41467-021-20938-6), 2021-01-27
Supplement: 41467_2021_20938_MOESM3_ESM.pdf [file 41467_2021_20938_MOESM3_ESM.pdf]

## Description of Additional Supplementary Files

File Name: Supplementary Movie 1

Description: Deformation reversal of aligned LCN<sub>1</sub>(20,120), LCN<sub>1</sub>(40,120), LCN<sub>1</sub>(60,120) actuators during cooling processes, and reversible deformation reversal recorded in one cooling/heating cycle for LCN<sub>1</sub>(20,120).

File Name: Supplementary Movie 2

Description: Deformation reversal of aligned LCN<sub>2</sub>(540%,400%), LCN<sub>2</sub>(700%,400%) and LCN<sub>2</sub>(1000%,400%) actuators during cooling.

File Name: Supplementary Movie 3

Description: Twisting-untwisting bidirectional deformation of a -45° aligned LCN<sub>1</sub>(60,120) actuator during cooling.

File Name: Supplementary Movie 4

Description: Unwinding-winding bidirectional deformation of a +45° aligned LCN actuator during cooling.

File Name: Supplementary Movie 5

Description: Light-induced deformation reversal behavior of polydopamine(PDA)-coated LCN actuators: PDA-coated LCN<sub>1</sub>(20,120) and LCN<sub>2</sub>(1000%,400%) actuators.

File Name: Supplementary Movie 6

Description: Light-driven micro-walker of polydopamine-coated LCN<sub>1</sub>(20,120).

File Name: Supplementary Movie 7

Description: Light-driven shape change and locomotion of a wave-shaped deformation-reversal actuator.

File Name: Supplementary Movie 8

Description: Light-driven multimodal locomotion of a single deformation-reversal actuator upon different light irradiation patterns: locomotion mode I, II and III.

File Name: Supplementary Movie 9

Description: Light-driven multimodal locomotion of a single deformation-reversal actuator upon different light irradiation patterns: locomotion mode IV and V.
